# Supplementary material
Source: MDPI journal article supplement (https://www.mdpi.com/1424-2818/13/8/351)
Supplement: s1 [file s1]

Archive with 8 entries (8 files):
- Suppl_Fig_S1_Fotos.pdf
- Suppl_Fig_S2_Breeding_plan_1934.pdf
- Suppl_Fig_S3_Fst.pdf
- Suppl_Table_S1.pdf
- Suppl_Table_S2.pdf
- Suppl_Table_S3.pdf
- Suppl_Table_S4.pdf
- Suppl_Table_S5.pdf
